# Supplementary material for: Identification and Validation of an Individualized EMT-Related Prognostic Risk Score Formula in Gastric Adenocarcinoma Patients
Source: Biomed Res Int. 2020 Mar 20;2020:7082408. doi: 10.1155/2020/7082408 (PMC7142392; doi:10.1155/2020/7082408)
Supplement: Supplementary Materials — The data of risk score of GAC patients related to EMT (Figure 8). [file 7082408.f1.txt]

id	futime	fustat	MMP8	MMP11	MYB	TFDP3	F2	CNTN1	riskScore	risk
TCGA-HU-A4GY-11A	0.021917808	0	0.070630723	1.068018527	0.051117966	0.04201232	0.178234529	1.841262044	1.619703966	high
TCGA-HU-A4GH-11A	0.980821918	0	0.051828923	1.102009985	0.197668497	0	0.229479576	2.073863374	1.61322865	high
TCGA-HU-A4GP-11A	0.747945205	0	0	1.293199644	0.113836822	0.014115009	0.063218688	2.19066549	1.747450715	high
TCGA-HU-A4GN-11A	2.498630137	0	0.015624174	0.847082731	0.084459576	0.015983487	0.163646546	2.247715196	1.583740426	high
TCGA-FP-7829-11A	1.62739726	0	0	0.887006174	0.132304497	0.024305259	0.055028359	2.579653328	1.714485136	high
TCGA-BR-7704-11A	2.936986301	0	0.063763253	1.035063958	1.011143404	0	0.211773485	2.25851463	1.286267322	high
TCGA-HU-A4GC-11A	0.271232877	0	0.008714954	1.055898945	0.073471861	0	0.160721128	2.12883048	1.61209041	high
TCGA-D7-8572-01A	1.4	0	0.547581143	2.694623775	1.492918785	0.018264659	1.167938654	0.81466541	2.213038481	high
TCGA-BR-7959-01A	2.767123288	0	0.149172365	2.538299745	1.783076753	0	0.031764763	1.459469847	1.329762449	high
TCGA-CD-8533-01A	1.282191781	0	0.026524014	2.572007029	2.093322185	0.035983596	1.967942563	1.045575559	1.976607932	high
TCGA-RD-A8N2-01A	9.698630137	0	0.009067034	1.207293808	0.387987826	0.036512013	0.070701705	1.585055423	1.311139054	high
TCGA-VQ-A92D-01A	5.567123288	0	0.020652074	2.507990542	1.510460339	0	1.240143526	0.022094186	1.2414801	high
TCGA-ZA-A8F6-01A	1.438356164	0	0.192972186	2.177235473	2.112563908	0	0.113883748	1.192519864	0.999009994	high
TCGA-IN-A7NR-01A	0.542465753	0	0	2.517348772	1.372179273	0.054875127	0	0.988028723	1.280796955	high
TCGA-CD-8524-01A	1.063013699	0	0	2.754668028	0.474253013	0.043693344	0.192628985	0.550586929	1.696739774	high
TCGA-CG-4475-01A	1.915068493	0	1.018613414	2.38532736	0.85045505	0.016620287	0.294562239	0.918565342	2.326022381	high
TCGA-HU-A4GD-01A	1.895890411	0	0.647354191	1.118768294	2.083805217	0.622990371	1.637446577	0.648430606	2.581518993	high
TCGA-KB-A93G-01A	1.679452055	0	1.781033137	2.036374847	1.462892126	0	0.091617527	0.753268376	2.039744342	high
TCGA-D7-6519-01A	1.712328767	0	0.051164784	2.768925397	1.939190331	0.052316453	0.046126861	1.124213896	1.271163835	high
TCGA-BR-7958-01A	2.463013699	0	0	2.840043016	1.843324902	0	0	0.658105532	1.035522987	high
TCGA-BR-7197-01A	0.767123288	0	0	2.528519157	1.835987947	0.057556933	0.165615903	0.457463042	0.982316358	high
TCGA-KB-A6F7-01A	5.301369863	0	0.390451873	1.595684725	0.938366148	0.050948392	1.270575138	0.017481385	1.345354098	high
TCGA-CD-5800-01A	1.095890411	0	0.084155497	2.414720078	1.551526799	0	0.764660595	0.185846495	1.101130152	high
TCGA-CD-8530-01A	1.032876712	0	0.149274985	1.349910822	0.604058917	0.036356627	0.195498067	1.100601262	1.217153144	high
TCGA-D7-8578-01A	1.761643836	0	0.133472227	3.255781894	1.255765557	0	0.097401968	1.191545611	1.9188429	high
TCGA-BR-8381-01A	0.61369863	0	0.147371674	2.760568574	1.73074596	0.187187259	0.456197976	0.354675922	1.494293614	high
TCGA-BR-8077-01A	0.057534247	0	0.070807272	2.094059443	1.450071511	0.021321369	1.447220307	0.033232048	1.222215905	high
TCGA-R5-A7O7-01A	3.805479452	0	0.083141491	2.144628104	1.230704004	0.162071781	0.294239681	0.256620795	1.199820702	high
TCGA-BR-A44T-01A	2.843835616	0	0.037925613	1.331057516	1.167946631	0.019614974	0.110138407	1.701207355	1.114481363	high
TCGA-D7-8570-01A	2.060273973	0	0.101474018	2.634122848	1.094606392	0.036002935	0.174360759	0.345138422	1.275843051	high
TCGA-D7-8579-01A	1.742465753	0	0.023051357	1.850632544	1.786085859	0	0.050944804	1.81632104	1.096863387	high
TCGA-BR-6803-01A	2.6	0	0	1.674201901	1.199061162	0	0.043169565	1.451159967	1.083384534	high
TCGA-CG-5719-01A	0.084931507	0	0.362701544	2.800147273	1.088682262	0	0.147971398	1.521302887	2.143309257	high
TCGA-BR-8483-01A	0.449315068	0	0.070873723	2.689730845	1.906836429	0.029730597	0.401396037	0.741572603	1.205538743	high
TCGA-CD-8526-01A	1.043835616	0	0.032574508	1.977615128	1.509699995	0	0.143681968	1.189448073	1.05616478	high
TCGA-BR-8297-01A	0.616438356	0	0	1.495287609	1.537129573	0.041815923	0.0458063	1.601248539	1.009615458	high
TCGA-F1-A72C-01A	0.947945205	0	0.026047304	2.726003299	1.987073907	0	0.131765715	0.655514305	0.998962834	high
TCGA-CD-A48A-01A	1.035616438	0	0.203794955	2.361917432	2.307796613	0.081793814	0.558130745	1.617524265	1.50004101	high
TCGA-IN-8462-01A	1.567123288	0	0.071913591	1.980439984	0.794807702	0	0.157686368	1.24702328	1.387860909	high
TCGA-BR-A4J8-01A	1.126027397	0	0.035292718	2.665886126	1.673863051	0	0.056384606	1.545918531	1.425378283	high
TCGA-BR-8682-01A	2.715068493	0	0.845878095	2.21668042	1.95011048	0	0.058399469	0.970240162	1.305542611	high
TCGA-BR-8677-01A	2.22739726	0	0.090632237	2.195815813	1.860663739	0	0.224749854	1.085982961	1.042777135	high
TCGA-VQ-A91A-01A	3.287671233	0	1.387332227	2.120871284	1.361377997	0.027561361	0.018258354	0.43305695	1.65991013	high
TCGA-BR-8369-01A	1.169863014	0	0.265742072	1.921162928	1.740855287	0.017622117	0.293229264	0.830794811	1.015348034	high
TCGA-BR-7715-01A	2.802739726	0	0.093046959	2.512121275	1.916387888	0	0.84005874	0.954467445	1.351074881	high
TCGA-CG-4477-01A	2.580821918	0	0.105455758	2.125794113	2.141871295	0.166268062	0.126331423	0.767104351	1.012742201	high
TCGA-IN-A7NT-01A	0.884931507	0	0.19717662	2.804795748	0.64269393	0	0.03267714	0.674951564	1.671112419	high
TCGA-IN-A6RN-01A	1.62739726	0	0.053511177	2.001589264	0.432360554	0	0.254566016	0.402206306	1.213627707	high
TCGA-BR-A4J9-01A	0.038356164	0	0.007011063	1.057788962	1.011600434	0.014286268	0.03714198	2.007904184	1.119804755	high
TCGA-D7-6520-01A	1.569863014	0	0	2.944198149	1.24789639	0	0.049301612	0.664575966	1.329291543	high
TCGA-IN-A7NU-01A	0.975342466	0	0.050501539	2.824500774	0.859716257	0	0	0.578122375	1.408089646	high
TCGA-FP-8631-01A	0.046575342	0	0.215349134	2.646291528	0.777367269	0.032876755	0.993085753	0.294178285	1.908964069	high
TCGA-D7-6526-01A	1.432876712	0	0.74798404	2.15682142	1.955270115	0.033060167	0.503925365	0.617874241	1.30892099	high
TCGA-BR-8364-01A	1.849315068	0	0.006824661	1.949434984	1.219750584	0.013908018	0.104155271	2.11374572	1.553349294	high
TCGA-BR-6563-01A	3.260273973	0	0.410492496	1.920965467	1.496960268	0.018000249	0.011901749	1.588466368	1.378458022	high
TCGA-HF-7133-01A	5.254794521	0	0.148143161	2.066645927	1.3799934	0	0.276092893	0.598973868	1.028103973	high
TCGA-BR-6457-01A	1.139726027	0	0	1.793340718	1.37060732	0	0.031910406	1.533695827	1.098353879	high
TCGA-SW-A7EA-01A	1.58630137	0	0.034971827	2.650459734	1.647408418	0	0.01589543	0.864417901	1.123069784	high
TCGA-RD-A8N9-01A	2.967123288	0	0.083097187	2.56107442	1.782347406	0	0.0257669	1.395905035	1.272600713	high
TCGA-CD-8531-01A	1.049315068	0	0.072265572	2.375419276	1.119090402	0.019082439	0.049389692	0.128196472	0.989150895	high
TCGA-CD-A487-01A	1.024657534	0	0.012572516	2.691220908	1.257587172	0	0.033484285	1.096269548	1.391568933	high
TCGA-BR-8384-01A	0.309589041	0	0	1.562415033	0.726266401	0	0.068163381	1.796933138	1.368809138	high
TCGA-B7-A5TI-01A	1.630136986	0	0.118936973	2.879207777	1.74030529	0	1.035465062	0.2903518	1.41902086	high
TCGA-F1-A448-01A	1.77260274	0	0.792899109	1.755425187	1.874745704	0.01568542	0.070029616	1.891115182	1.529144247	high
TCGA-CD-8525-01A	1.049315068	0	0.162241985	1.985001714	1.286966919	0	0.39193736	0.521032504	1.045734537	high
TCGA-FP-A8CX-01A	0.019178082	0	0.174897139	2.132958084	1.762608119	0.055035058	1.348168327	0.049527151	1.196101067	high
TCGA-BR-7716-01A	3.315068493	0	0.006828799	2.537965917	1.792195965	0	0.592480867	0.348621113	1.029601068	high
TCGA-BR-8366-01A	0.079452055	0	0.08893411	2.457336323	1.554591629	0.050790454	0.127733982	0.520619533	1.089437658	high
TCGA-D7-A6F0-01A	1.857534247	0	0.006939596	2.334819826	0.666964561	0.014141257	2.278890535	0.085098559	2.21240886	high
TCGA-BR-7196-01A	1.824657534	0	0.062164182	1.865912703	0.976643686	0.018651035	0.126634794	1.884654154	1.566764747	high
TCGA-FP-7829-01A	1.62739726	0	1.557902244	2.642061382	2.272404848	0	0.050271002	0.188580496	1.460847662	high
TCGA-B7-A5TN-01A	0.78630137	0	0.138339968	3.177161628	1.224805202	0.014529013	0.149907421	0.751622459	1.687703456	high
TCGA-CG-4305-01A	1.328767123	0	0.061639871	2.68954801	1.483639543	0.021532492	0.082086	0.339708185	1.072832065	high
TCGA-B7-A5TK-01A	0.789041096	0	0	2.855498711	1.43060346	0.015238944	0.287975522	0.861745548	1.427225709	high
TCGA-BR-6710-01A	0.747945205	0	0.01679744	0.571497173	0.440198233	0.034025605	0.392187215	1.305314589	1.024643106	high
TCGA-D7-6522-01A	1.550684932	0	0.34867341	2.675938021	1.633064292	0.023070764	0.12836149	0.700025389	1.327182844	high
TCGA-CG-4301-01A	0.252054795	0	0.485889487	2.77066301	1.030682231	0.016658704	0.104132689	0.592850088	1.68639451	high
TCGA-HU-8602-01A	1.860273973	0	0.643486993	1.45459047	0.392127722	0.015235782	0.029853638	0.124727918	1.125348413	high
TCGA-BR-8485-01A	0.767123288	0	0.064389312	2.563167023	1.364631722	0.026949589	1.780750483	0.443334383	1.927092276	high
TCGA-D7-6524-01A	1.487671233	0	0.171887414	2.58555406	1.791080387	0	0.114831	0.434894597	0.995105289	high
TCGA-BR-A4J5-01A	2.361643836	0	0.06510989	2.092652849	1.540286893	0	0.213512218	0.934336327	1.041211427	high
TCGA-CD-5798-01A	1.117808219	0	0.039432445	3.013020742	1.147942954	0	0.039862933	0.784199657	1.488170914	high
TCGA-BR-6801-01A	3.350684932	0	0.170057685	2.587249681	1.496867576	0.077561553	0.013274871	0.350549106	1.140228983	high
TCGA-BR-8058-01A	3.104109589	0	0.008644209	2.378627309	1.414126773	0.0175966	0.178644026	0.593854933	1.064270548	high
TCGA-VQ-A8E2-01A	3.61369863	0	0.106463299	2.568813012	1.758066975	0.016427441	1.266179825	1.515026148	2.068970761	high
TCGA-RD-A8N4-01A	5.947945205	0	0.00723019	1.152657206	0.988539884	0.014730813	0.038281785	1.674080267	1.047108288	high
TCGA-CG-5723-01A	6.838356164	0	0.548743184	2.300596301	0.953750409	0.06093157	0.040633773	0.194967003	1.353135717	high
TCGA-F1-6874-01A	1.205479452	0	0.518084587	2.385103251	2.247071732	0.020984207	0.574362357	0.213234793	1.030694175	high
TCGA-BR-8690-01A	0.890410959	0	0.184156519	2.751847409	1.881892477	0.058177949	0.660600914	0.825078603	1.520544758	high
TCGA-MX-A5UJ-01A	1.643835616	0	0.144090856	2.45276943	1.681716393	0.015933218	0.118424161	0.727358944	1.091543557	high
TCGA-SW-A7EB-01A	0.482191781	0	0.060904069	1.890428407	0.774236484	0.062266886	2.202404468	0.204579032	2.001726207	high
TCGA-D7-6521-01A	1.545205479	0	0.0530113	2.533689973	0.966656477	0	0.186535389	0.920250337	1.453024656	high
TCGA-HU-8610-01A	0.063013699	0	1.271709748	1.790338196	1.494724433	0	0.014527452	0	1.109932586	high
TCGA-BR-8373-01A	1.232876712	0	0.108738398	2.224428427	1.73832583	0.043404232	0.650274243	1.062922903	1.33421113	high
TCGA-BR-A4J6-01A	0.054794521	0	0	2.891255604	0.994958132	0.014433409	0.082184028	1.06075439	1.662576751	high
TCGA-BR-8286-01A	2.452054795	0	0.219937088	2.39194763	1.78863908	0.057436633	0.311542072	0.721278605	1.196842434	high
TCGA-CD-8529-01A	1.024657534	0	0.477487508	2.642440062	1.416795615	0	0.347701369	0.527102879	1.463527873	high
TCGA-BR-7717-11A	1.512328767	1	0.053383227	1.076584001	1.059432021	0	0.057438692	1.753308425	1.028642076	high
TCGA-HU-A4HB-11A	1.306849315	1	0.019327445	1.164351273	0.155877264	0	0	1.994409797	1.491268725	high
TCGA-FP-7735-11A	0.290410959	1	0	0.986483505	0.10851767	0	0	1.900018603	1.359758062	high
TCGA-BR-8060-11A	0.953424658	1	0.02082579	0.944583686	0.336488069	0.021303227	0.106660192	2.147091739	1.451564755	high
TCGA-R5-A7ZE-01B	1.517808219	1	0.116818305	1.473685598	1.557751098	0	1.116155595	1.688375013	1.44601877	high
TCGA-D7-6818-01A	1.030136986	1	1.081149301	2.399927192	1.617966818	0	0.922460888	2.210505954	3.469451633	high
TCGA-BR-A4IV-01A	2.380821918	1	0.040727793	0.974991475	0.742941213	0.012110366	0.105602773	1.585643194	1.063770703	high
TCGA-BR-8296-01A	1.298630137	1	0.423467581	2.439736996	1.735516121	0.170734992	0.780354744	0.692759203	1.820063795	high
TCGA-BR-6456-01A	1.44109589	1	0.055151952	3.11078573	2.147820373	0	0.010905602	1.38425603	1.363690005	high
TCGA-BR-7717-01A	1.512328767	1	0.111483768	2.742168116	1.99887443	0.021890197	0.014485024	1.06631709	1.182567058	high
TCGA-D7-A747-01A	0.698630137	1	0.312605513	1.989202503	1.597545824	0.114633696	0.273204616	1.750389197	1.711530506	high
TCGA-BR-4256-01A	0.778082192	1	2.523826639	2.40748312	1.932748305	0.02269291	0.029775964	1.306061341	3.419080954	high
TCGA-CG-4440-01A	0.334246575	1	0.397212805	2.050163913	0.915693317	0.037902141	1.143810641	0.117448468	1.574825182	high
TCGA-BR-8295-01A	0.183561644	1	0.236589503	2.153029577	0.702590899	0.173765789	2.435028001	0.192532341	3.047834147	high
TCGA-BR-7722-01A	1.276712329	1	0.059426032	2.910103905	1.08413896	0.048950776	0.302429487	0.844347979	1.747700694	high
TCGA-VQ-A94P-01A	0.221917808	1	0.028490614	1.384088048	0.674760511	0.014695469	0.028803687	1.688576412	1.279142554	high
TCGA-D7-8575-01A	1.517808219	1	0.307707202	2.091546604	1.126799454	0.036428656	0.186112968	0.36726559	1.140923677	high
TCGA-VQ-A8PP-01A	1.950684932	1	0.119590175	2.862803744	1.990533346	0.016278279	0.021384388	0.415488716	0.997037558	high
TCGA-VQ-A91Y-01A	0.810958904	1	0.062920418	2.806225057	1.342823402	0	0.047564502	1.095951229	1.452869678	high
TCGA-RD-A8MW-01A	3.15890411	1	0.696211804	2.624723301	1.70229154	0.016302248	0.646099401	0.508670895	1.636323285	high
TCGA-BR-8382-01A	2.087671233	1	0.042513779	2.936234973	1.950531876	0	0.083866044	0.899472219	1.177913267	high
TCGA-BR-8060-01A	0.953424658	1	0.197566143	2.076591566	1.379455395	0	0.584191526	1.92523787	1.817006627	high
TCGA-BR-6458-01A	1.610958904	1	0.01583261	2.563541961	1.152201251	0	0.021277501	0.601831361	1.159868142	high
TCGA-VQ-A8PB-01A	2.857534247	1	0.857433286	2.279885694	2.291155408	0	0.452576091	0.314514682	1.099343497	high
TCGA-BR-8284-01A	0.671232877	1	0.119418539	2.348390295	1.873269333	0.047853415	0.183689291	0.822619306	1.073010341	high
TCGA-BR-4191-01A	1.528767123	1	0.26294346	2.389908402	1.481808546	0.284267403	0.149690503	0.382031861	1.539161462	high
TCGA-CD-A486-01A	0.526027397	1	0.255694969	2.881655773	1.19742373	0.092255968	0.340693455	0.612284669	1.805965181	high
TCGA-MX-A663-01A	0.821917808	1	0.278622694	2.350717411	0.689054424	0.017203663	2.820503615	1.459272642	4.730726467	high
TCGA-VQ-A8DZ-01A	1.084931507	1	0.056879894	1.869302308	1.196536795	0.07208774	2.074177894	0.22617254	1.692983496	high
TCGA-BR-A4CS-01A	0.123287671	1	0.069977337	2.34511314	0.596971173	0	2.1644535	0.259773199	2.342644705	high
TCGA-RD-A7BW-01A	0.42739726	1	0.249898558	2.714157056	0.617971718	0	0.221969584	2.119185517	2.871799929	high
TCGA-BR-8371-01A	0.983561644	1	0	1.005870731	0.626623987	0	0.151607597	2.34872345	1.414459284	high
TCGA-BR-6705-01A	2.134246575	1	0.124501926	2.335654869	0.901362912	0	0.058252877	0.949700162	1.376928837	high
TCGA-BR-6564-01A	2.175342466	1	0	1.705278079	0.440197233	0	0.125614772	1.590999733	1.507135367	high
TCGA-VQ-A8DV-01A	1.104109589	1	0.2884543	1.809286312	0.797119384	0.013736397	2.476663488	0.01233117	2.05147391	high
TCGA-VQ-A8PQ-01A	1.304109589	1	0.073418143	2.174225078	1.482842032	0.01555262	0.12471628	1.607546427	1.363753267	high
TCGA-BR-8291-01A	1.663013699	1	0.019001805	1.79862186	1.786552061	0.019437906	0.475983243	1.350938941	1.082345933	high
TCGA-HU-A4GQ-01A	0.008219178	1	0.102540858	2.559097335	2.192230865	0	0.012162823	1.341188353	1.098656695	high
TCGA-BR-8687-01A	0.684931507	1	0.029483524	2.835103523	0.767413127	0	0.966668734	0.772156877	2.10788323	high
TCGA-BR-8683-01A	0.821917808	1	0.215820443	2.681006528	1.900291775	0.045987438	0.168638602	0.54546556	1.139957041	high
TCGA-VQ-A925-01A	0.378082192	1	0.006144359	1.698837034	1.65640792	0.072518522	0.733648344	1.183582244	1.191948695	high
TCGA-VQ-A8P5-01A	0.643835616	1	0.370910025	2.976988279	1.940193142	0.301024084	0.531023146	0.867754021	2.36938997	high
TCGA-CD-8532-01A	0.969863014	1	0.044055268	2.56086567	1.890186586	0	0.204462615	0.659612315	1.000719712	high
TCGA-BR-8590-01A	0.778082192	1	0.108097827	2.663591043	1.577884854	0	0.113013438	1.45715679	1.500651981	high
TCGA-D7-A748-01A	0.361643836	1	0.719011868	2.70329044	0.993198314	0	0.021735906	1.202741288	2.156803675	high
TCGA-IN-8663-01A	0.282191781	1	0.017433597	2.683234765	0.975241449	0	0.121419034	0.16459238	1.14784999	high
TCGA-CG-4460-01A	1.832876712	1	0.201954769	1.762978315	0.828905033	0.019260894	0.390562271	2.668408578	2.384151682	high
TCGA-RD-A8N5-01A	4.78630137	1	0.297444834	1.991939966	1.162502867	0.169925018	0.027141768	0.848533207	1.438691986	high
TCGA-VQ-A8DU-01A	0.454794521	1	0.114036335	2.041484115	1.784898064	1.849585989	0.488772671	0.37686339	10.11313409	high
TCGA-BR-4257-01A	0.805479452	1	0.946561462	2.498104842	1.860641638	0	0	0.311281702	1.231241974	high
TCGA-BR-7723-01A	2.394520548	1	0	1.991867574	1.25750923	0.021712859	2.365902656	0.439015663	1.87216726	high
TCGA-VQ-A928-01A	0.476712329	1	0.42114658	2.346359515	0.874301473	0	0.056024476	1.361168799	1.826423567	high
TCGA-BR-8059-01A	1.202739726	1	0.246696702	3.11774139	1.245066212	0.018751424	0.148453858	1.03352654	1.900656449	high
TCGA-BR-7901-01A	0.287671233	1	0.262865619	2.746336988	1.117563707	0	0.198241232	1.208748788	1.821742943	high
TCGA-CG-4306-01A	0.002739726	1	1.213393118	2.639086234	1.922012904	0.052736912	0.011866136	0.152100085	1.464674441	high
TCGA-VQ-A8PJ-01A	0.224657534	1	0.050257483	1.698788864	0.635019929	0.013142641	1.022421915	0.029192439	1.166928898	high
TCGA-FP-7916-01A	1.17260274	1	0	2.531865071	1.650079732	0.035328111	0.090084602	0.847504221	1.127264818	high
TCGA-BR-4187-01A	0.38630137	1	0.215022887	1.309401851	1.239870206	0.017740604	0.034712785	1.428143989	1.038821206	high
TCGA-CD-5803-01A	0.934246575	1	0	2.543736059	1.534269337	0.02670639	0.345231694	0.547538289	1.142180482	high
TCGA-D7-6525-01A	1.112328767	1	0.108590496	3.039506035	0.761571346	0.035725159	0.290874904	0.984697204	2.136302713	high
TCGA-BR-4279-01A	0.797260274	1	1.030610148	1.469179125	1.720403799	0	0.012108225	2.004872312	1.601603657	high
TCGA-BR-8080-01A	0.8	1	0.145555621	1.965443226	1.369816391	0.018919348	0.036994746	1.071519889	1.1015555	high
TCGA-R5-A7ZF-01A	0.709589041	1	0.094375046	1.883255212	1.891130446	0.065511991	0.043728074	1.544703778	1.101231382	high
TCGA-VQ-A922-01A	0.753424658	1	0.096096653	2.533242982	1.856031448	0.020577498	0.12712023	0.761630597	1.062649953	high
TCGA-CG-5724-01A	1.002739726	1	0.279147555	2.731796328	1.266729282	0.065341181	0.043612582	0.077569855	1.235644244	high
TCGA-VQ-A94O-01A	1.753424658	1	0.494095449	2.175954053	1.670538904	0	1.940142096	0.016508654	1.610734944	high
TCGA-VQ-AA64-01A	1.534246575	1	0.079526748	3.00920617	1.467447108	0	0.375096291	0.983505812	1.626736186	high
TCGA-FP-A4BF-01A	0.460273973	1	0.220927923	2.938114118	2.069334601	0	0.086381538	0.617405104	1.119219971	high
TCGA-RD-A7BS-01A	0.920547945	1	0.589701033	2.447288341	1.454509933	0.222469735	0.533070804	1.059150856	2.404585354	high
TCGA-BR-8365-01A	1.460273973	1	0	1.603158509	1.136934936	0	0.277435317	2.263388332	1.523194636	high
TCGA-CD-8527-01A	0.597260274	1	0.149239714	2.764799373	1.400209585	0	0.310865762	0.624119032	1.357870152	high
TCGA-BR-7957-01A	0.756164384	1	0.048670655	2.093537667	1.859199647	0.028796328	0.046920139	1.445741039	1.08906567	high
TCGA-BR-8367-01A	2.194520548	1	0.094107169	1.987066354	2.014222009	0.053816533	0.204589815	1.219063798	1.024212241	high
TCGA-BR-6709-01A	1.01369863	1	0.013372472	1.911644288	0.32372304	0.027143834	0.017980262	0.424298606	1.15370524	high
TCGA-BR-4201-01A	2.575342466	1	0.602219432	2.493537056	1.359016137	0	0	1.134714203	1.630689377	high
TCGA-FP-8209-01A	4.961643836	1	0	1.794639135	0.988869384	0.018254489	0.134521299	1.500619213	1.302001618	high
TCGA-FP-8210-01A	0.419178082	1	0.018624131	2.067007729	1.547330613	0.019051661	0.095888693	1.217817274	1.093375864	high
TCGA-VQ-A8PH-01A	1.065753425	1	0.018322658	1.924326794	1.889375694	0	1.731415164	0.103830245	1.06065403	high
TCGA-D7-8576-01A	1.221917808	1	0.163536105	2.102220645	1.268635425	0.048950135	0.302426087	0.194076765	1.022258015	high
TCGA-VQ-AA6K-01A	1.035616438	1	0.03275387	2.636736445	1.572605153	0.016915099	0.085563201	0.524611296	1.067653902	high
TCGA-RD-A8N6-01A	0.745205479	1	0.01953665	2.52460266	1.77808146	0.013375365	1.5856747	1.39856678	2.06636031	high
TCGA-VQ-A8PE-01A	1.849315068	1	0.118942659	2.104775802	1.70833113	0.014401453	2.090323296	0.092454844	1.437158619	high
TCGA-ZQ-A9CR-01A	0.065753425	1	0.593491328	2.533134365	0.783893479	0.021180904	0.154434966	0.153409585	1.546356937	high
TCGA-BR-8289-01A	0.221917808	1	0	2.149251066	0.704486949	0	0.083355824	0.615040863	1.165637633	high
TCGA-R5-A805-01A	0.769863014	1	1.620458921	2.091228011	1.85035092	0	0.174182018	0.355503564	1.538123834	high
TCGA-BR-4267-01A	0.515068493	1	0.198440256	2.446594428	0.527603206	0.023789015	0.491080959	0.113693596	1.504367726	high
TCGA-MX-A5UG-01A	0.309589041	1	0.013167327	1.877383788	1.943881058	0	0.060411358	2.068610642	1.144133575	high
TCGA-HJ-7597-01A	2.205479452	1	0.221122402	2.014500427	2.490922511	0.264071343	0.558975689	0.192854169	0.987893361	high
TCGA-VQ-A91Q-01A	1.734246575	1	0.172690702	2.45302328	0.695357814	0	0.547770706	1.860504319	2.498998146	high
TCGA-CD-A48C-01A	0.967123288	1	0.203124284	2.735435715	0.99757516	0.014142213	0.063337041	0.502596291	1.414055849	high
TCGA-EQ-8122-01A	0.665753425	1	0.294531017	2.484501474	1.935503475	0	0.119525762	1.03144603	1.18064879	high
TCGA-RD-A7C1-01A	1.389041096	1	0.796043161	1.718584237	1.535127717	0.305724941	0.670960423	0.627020948	1.970469848	high
TCGA-CD-A489-01A	0.942465753	1	0.038784402	2.359231203	0.5275551	0.02006407	0.013271814	1.485982779	1.825971703	high
TCGA-IP-7968-11A	0.210958904	0	0.011116844	0.507327124	0.674408712	0.022596106	0.01495424	1.228425409	0.785439658	low
TCGA-CG-5721-11A	0.501369863	0	0	0.797437691	0.799103356	0.053872325	0	0.490011678	0.679047705	low
TCGA-CG-5730-11A	0.334246575	0	0	0.829334652	1.563855857	0	0.07276227	0.747235223	0.558032741	low
TCGA-CG-5722-11A	0.082191781	0	0	0.93440036	0.881119358	0	0.094985879	1.280603136	0.871271455	low
TCGA-IN-AB1X-11A	1.126027397	0	0	0.169841061	1.166659993	0.014031782	0	1.233028104	0.57821011	low
TCGA-BR-7703-11A	3.01369863	0	0	1.117433829	1.031017488	0	0.116212125	0.36691521	0.660167665	low
TCGA-BR-6453-11A	1.328767123	0	0	0.608044675	1.915435377	0.0232877	0.015414068	1.293608658	0.556636068	low
TCGA-BR-7716-11A	3.315068493	0	0	1.076958498	1.354049114	0	0.104154206	1.195516624	0.769655835	low
TCGA-IN-7806-11A	3.030136986	0	0	0.185881616	1.259003134	0	0.043347819	0.89050046	0.501338915	low
TCGA-HU-8238-11A	0.126027397	0	0	0.566637036	1.42835179	0	0.046155676	0.258101033	0.444291865	low
TCGA-CG-5728-11A	1.58630137	0	0	1.040229662	0.819096012	0	0.108682264	0.55642129	0.729597604	low
TCGA-BR-6802-11A	2.575342466	0	0	0.820526831	0.938880383	0	0	0.822902642	0.681526629	low
TCGA-BR-6457-11A	1.139726027	0	0	0.856485248	1.472559172	0.034089977	0.066099698	0.666333958	0.589956809	low
TCGA-IN-AB1V-11A	1.312328767	0	0	0.340168709	1.316319428	0	0.010118791	1.565133109	0.646716979	low
TCGA-BR-7715-11A	2.802739726	0	0.052660992	1.105739539	1.06854446	0	0.053231364	0.923878458	0.784634159	low
TCGA-VQ-A8E7-01B	3.117808219	0	0.131146748	2.331602213	1.626454636	0.015150246	0.048915506	0.097034012	0.83479219	low
TCGA-VQ-A91Z-01A	4.630136986	0	0.022942404	1.66449723	2.148447443	0.031148068	0.098528027	0.021079285	0.528182978	low
TCGA-HU-A4HD-01A	2.783561644	0	0.146287555	1.970244498	1.738942395	0	0.185973269	0.665728624	0.875969023	low
TCGA-D7-8573-01A	1.624657534	0	0.198499106	2.046610275	2.07072536	0.053311334	0.133776102	0.150232854	0.736495977	low
TCGA-BR-6453-01A	1.328767123	0	0.024969261	1.036082419	1.929433464	0	0.049756932	1.092717765	0.604248886	low
TCGA-VQ-AA6A-01A	3.243835616	0	0.037843636	1.874068306	1.368704499	0	0.28056227	0.125180614	0.780420561	low
TCGA-HF-7132-01A	6.44109589	0	0.00695376	2.221492155	2.376342159	0.014169998	0.018622034	0.378207933	0.645946897	low
TCGA-BR-8680-01A	2.663013699	0	0.067345235	2.560937863	2.584969518	0.040026175	0.148141688	0.24839165	0.729244897	low
TCGA-VQ-A8P2-01A	3.178082192	0	0.042184229	1.890986169	2.308953908	0	0.083231598	0.004947374	0.523498207	low
TCGA-HU-A4GT-01A	0.542465753	0	0.087063129	2.261252528	2.383213033	0	0.105517404	0.059101845	0.615430329	low
TCGA-D7-A74A-01A	1.663013699	0	0.043465375	1.920279016	2.121303484	0.035743599	0.201973433	0.281771186	0.67259113	low
TCGA-HU-A4H2-01A	1.079452055	0	0.098477639	2.085243409	1.813634911	0	0.016408633	0.172650537	0.701680376	low
TCGA-HU-A4GP-01A	0.747945205	0	0.085590079	1.033381603	1.41808021	0.059317871	0.049148622	0.153790738	0.578000298	low
TCGA-VQ-A91E-01A	1.819178082	0	0.039962066	1.19446159	1.699623615	0.02746315	0.195823078	0.091834073	0.541405036	low
TCGA-FP-8211-01A	1.131506849	0	0	2.437072199	1.278781449	0.016603271	0.010975005	0.105859641	0.909663639	low
TCGA-RD-A8MV-01A	10.19178082	0	0.11746131	1.181256945	1.536058627	0	0.068001532	0.161701114	0.556757899	low
TCGA-BR-7707-01A	2.98630137	0	0.215874008	2.068240846	1.877746953	0	0.032585724	0.461683994	0.796966673	low
TCGA-IN-A6RS-01A	1.049315068	0	0.320301628	1.488189621	1.985960412	0.054116242	0.047719742	0.19308109	0.6388441	low
TCGA-BR-8487-01A	0.093150685	0	0.109790886	2.378655168	2.049555527	0.069091494	0.449794997	0.212599989	0.933773679	low
TCGA-VQ-A94U-01A	2.243835616	0	0.068016835	1.330850741	1.863987343	0.0179268	0.237248846	0.595956615	0.64853717	low
TCGA-HU-8249-01A	2.41369863	0	0.549516066	1.935507853	2.11484485	0.022128828	0.477196967	0.208056233	0.891210011	low
TCGA-BR-8372-01A	2.605479452	0	0.199439945	2.241679495	2.350376329	0.048005776	0.250868923	0.236246083	0.76955219	low
TCGA-HU-A4GF-01A	2.150684932	0	0.031417859	1.772769412	1.892904153	0.016218935	0.101519329	0.007312132	0.586003879	low
TCGA-R5-A7ZI-01A	6.210958904	0	0.039594316	1.383439267	1.021523425	0	0.026893489	0.009249484	0.64259955	low
TCGA-BR-8588-01A	1.065753425	0	0.011584963	2.276289918	2.115052487	0	0	0.559090393	0.74508691	low
TCGA-VQ-A8PX-01A	5.380821918	0	0.008419785	1.26571264	1.582294958	0.017142092	0.236701289	0.011569765	0.554291825	low
TCGA-D7-6822-01A	1.02739726	0	0.04724544	1.975753449	2.164453721	0.048311415	0.491826612	0.0746426	0.7073698	low
TCGA-MX-A666-01A	1.169863014	0	0.059054784	1.380311851	1.675015189	0.017695051	1.316808409	0.42704611	0.938775086	low
TCGA-HU-A4H6-01A	1.764383562	0	0	1.291571327	1.47002815	0	0.092525218	0.070905189	0.550166657	low
TCGA-CG-4438-01A	4.506849315	0	0.178687692	2.024930987	2.196112141	0.112094243	0.580669058	0.483438672	0.971406685	low
TCGA-VQ-AA69-01A	2.367123288	0	0.029023599	2.035698086	2.414238045	0.029685693	0.019673977	0.006747542	0.541699386	low
TCGA-IP-7968-01A	0.210958904	0	0.098895818	2.502985283	1.809794282	0	0.177765558	0.341780601	0.917963278	low
TCGA-KB-A93J-01A	3.079452055	0	0.189155985	1.674699576	0.869215919	0.017199586	0.156215657	0.152750507	0.902150208	low
TCGA-D7-A4YU-01A	1.369863014	0	0	1.645229189	2.157374572	0.016028528	0.031392973	0.536091824	0.58949943	low
TCGA-D7-A6EX-01A	0.942465753	0	0	1.620637769	1.940164265	0	0.228402359	0.137236759	0.572246983	low
TCGA-HU-A4G9-01A	2.016438356	0	0.037619587	0.88848209	2.178725073	0.019454995	0.02554261	0	0.374648793	low
TCGA-D7-A4YX-01A	3.035616438	0	0.037195445	2.13149811	2.018415982	0	0.096761865	0.030839797	0.636641096	low
TCGA-HU-A4GX-01A	1.687671233	0	0.007426673	2.169950259	2.262826988	0.015129318	0	0.109017582	0.597810526	low
TCGA-BR-8081-01A	2.687671233	0	0.106462185	2.694362924	2.31537764	0.063876799	0.063152801	0.45291693	0.915379197	low
TCGA-HU-A4H4-01A	1.98630137	0	0.122365604	1.467940202	2.296597556	0	0.049274119	0.063733995	0.468141015	low
TCGA-VQ-A91K-01A	5.101369863	0	0.018794393	2.534959773	2.286647357	0.012865416	0.033492604	0.504414678	0.787619872	low
TCGA-HU-A4G8-01A	1.890410959	0	0.200371087	2.021178866	2.283848641	0	0.015129704	0.088698115	0.598663312	low
TCGA-B7-A5TJ-01A	0.917808219	0	0.331834641	2.343588331	1.998701661	0	0.152869799	0.54445286	0.957996478	low
TCGA-BR-A4J4-01A	0.043835616	0	0.022208849	1.956803558	1.262525369	0.04484144	0.04911216	0.598649748	0.954073919	low
TCGA-IN-7806-01A	3.030136986	0	0.041058092	2.058146724	2.242642488	0	0.075894562	0.386648366	0.645442042	low
TCGA-VQ-AA6F-01A	4.509589041	0	0.013575881	1.713335253	1.706530928	0.013888474	0.427869015	0.229131398	0.720589463	low
TCGA-HU-A4GC-01A	0.271232877	0	0.015711706	2.578258333	1.831426859	0	0.061827267	0.173550988	0.82263601	low
TCGA-HU-A4H0-01A	0.175342466	0	0.006260052	1.601640338	2.2757385	0.025334584	0.016775746	0.039435247	0.477687299	low
TCGA-FP-7998-01A	1.857534247	0	0.017305632	2.173874379	1.938811031	0	0.034640345	0.479358488	0.748993452	low
TCGA-D7-8574-01A	1.432876712	0	0	1.525514266	2.006867641	0	0.209046247	1.324015582	0.79818185	low
TCGA-CG-4466-01A	1.580821918	0	0.387929982	1.271422018	2.155172978	0.045967651	0.116100532	0.180348475	0.578500522	low
TCGA-D7-A4Z0-01A	1.230136986	0	0.026886232	1.102990861	1.485979255	0.040922624	0.053517229	0.894996797	0.708063469	low
TCGA-CG-4444-01A	3.920547945	0	0.251728392	1.676777167	2.4793923	0.041925471	0.211466777	0.31957392	0.614358523	low
TCGA-D7-A6EV-01A	0.936986301	0	0.183884315	1.826869473	1.978371009	0.015446215	0.115012279	0.184338687	0.663215994	low
TCGA-HU-A4GH-01A	0.980821918	0	0.041810092	1.578326366	1.065148207	0.012437812	0.093661883	0.035760177	0.715727087	low
TCGA-FP-A9TM-01A	0.517808219	0	0.020226523	0.66989383	2.08198434	0	0.127774584	0.447344855	0.413054863	low
TCGA-BR-6852-01A	3.745205479	0	0.04667262	2.581819485	2.040750154	0.047726034	0.062337645	0.363220345	0.886156977	low
TCGA-CG-4443-01A	2.498630137	0	0.059401662	1.492069838	1.658603497	0.095168169	0.016432619	0.473855661	0.726175503	low
TCGA-D7-6815-01A	1.331506849	0	0.069976834	2.681433826	2.352644784	0.088503703	0.070726927	0.180033297	0.837071454	low
TCGA-BR-6452-01A	2.890410959	0	0.129505714	2.853046882	2.008895888	0.015770051	0.040942691	0.289231566	0.95632876	low
TCGA-BR-A4J7-01A	2.709589041	0	0.01035153	1.288481815	1.451114925	0	0.117747108	1.706238906	0.967304424	low
TCGA-VQ-A8DT-01A	4.065753425	0	0.111108802	0.810992312	2.00273835	0.058680796	0.138120113	0.068668528	0.444862987	low
TCGA-VQ-A8P8-01A	2.580821918	0	0.073144421	1.651623219	1.888884555	0	0.122995879	1.070132463	0.802826167	low
TCGA-BR-7704-01A	2.936986301	0	0.034915649	2.427340716	1.730414514	0	0.015869608	0.239891433	0.815463393	low
TCGA-CG-4436-01A	0.665753425	0	0.60078806	1.256596511	2.076784961	0.01745212	0.04523865	0.038645575	0.582531568	low
TCGA-HU-A4G2-01A	2.024657534	0	0.055515876	1.646154051	2.039344499	0.025699244	0.041921885	0.039998098	0.540773562	low
TCGA-IN-A6RI-01A	1.531506849	0	0.035771021	1.228123096	1.173270191	0.05429809	0.5906891	0.12805876	0.773408531	low
TCGA-CD-8534-01A	1.005479452	0	0.130156806	0.7643339	2.456681294	0.018990685	0.303620624	0.803645887	0.487408569	low
TCGA-VQ-AA68-01A	3.638356164	0	0.013935453	2.163221072	1.601835046	0	0	0.114376514	0.726804156	low
TCGA-BR-8676-01A	0.62739726	0	0.019065972	1.463395703	1.588554777	0	0.025606104	0.230408624	0.588268442	low
TCGA-CG-5721-01A	0.501369863	0	0.156552242	1.8607251	1.426607134	0.020469749	0	0.108811772	0.749719821	low
TCGA-CD-8528-01A	1.02739726	0	0.125633775	2.890016427	2.041645696	0	0	0.239823336	0.910621259	low
TCGA-HU-8244-01A	2.032876712	0	0.03373761	0.77490678	2.158798951	0.10990028	0.074003184	0.065812887	0.422012208	low
TCGA-KB-A93H-01A	3.136986301	0	0.011341964	1.699931225	1.992385748	0.023050541	0.227574951	0.020704068	0.577742162	low
TCGA-BR-A4PF-01A	0.095890411	0	0.030425495	1.522211355	2.174836652	0.024985923	0.016543723	0.081256635	0.490625687	low
TCGA-HU-A4G3-01A	0.465753425	0	0.051486086	1.908952492	1.317318902	0	0.222930516	0.034103875	0.770137694	low
TCGA-BR-8368-01A	0.35890411	0	0.095572365	1.798199891	2.448239825	0.104726737	0.144288922	0.256149964	0.630617766	low
TCGA-VQ-AA6J-01A	2.295890411	0	0.02363514	2.037635956	2.11175104	0.012174071	0.039459506	0.188724098	0.623093902	low
TCGA-BR-8591-01A	2.345205479	0	0.197796708	2.698919436	2.042407464	0.03092684	0.209881958	0.235290792	0.974022126	low
TCGA-FP-8099-01A	1.421917808	0	0.086239691	2.745249886	2.211901446	0.033127915	0.152245582	0.238726722	0.879754525	low
TCGA-VQ-A91V-01A	3.553424658	0	0.007649951	1.869514226	1.694556757	0.015582052	0.15987533	0.133414446	0.681018196	low
TCGA-RD-A8N0-01A	3.38630137	0	0.01921629	1.059164987	1.31958908	0.038868827	0.187058524	1.127210485	0.824244527	low
TCGA-HU-A4H5-01A	1.983561644	0	0.03264977	1.774142052	2.312517485	0	0.052210694	0.021119583	0.49579429	low
TCGA-CG-4437-01A	0.671232877	0	0.152587712	2.782441161	1.93922269	0	0	0.186102164	0.89832751	low
TCGA-HF-A5NB-01A	2.542465753	0	0.149787304	1.926376903	1.896768444	0	0.202143438	0.012875888	0.662776297	low
TCGA-IN-AB1X-01A	1.126027397	0	0.204952552	1.074065655	2.347760371	0	0.330850488	0.350484956	0.496408038	low
TCGA-BR-8678-01A	2.065753425	0	0.195157609	1.882659207	2.632415941	0.066524941	0.146109165	1.078546424	0.803366494	low
TCGA-D7-6528-01A	1.268493151	0	0.375478739	1.643629906	2.272241703	0.052486625	0.121582655	0.116955002	0.63102099	low
TCGA-HU-8238-01A	0.126027397	0	0.219834144	1.460014931	1.841217024	0	0.031700197	0.117791216	0.571751487	low
TCGA-BR-6802-01A	2.575342466	0	0.061179193	2.393494358	1.734243703	0.02557744	0.065803867	0.346467437	0.886383334	low
TCGA-CD-A4MH-01A	1.016438356	0	0	2.559359086	1.760729105	0.028424556	0.496468244	0.086194427	0.963730384	low
TCGA-HU-8604-01A	1.901369863	0	0.317624388	1.886793733	2.619048773	0	0.240285013	0.175761638	0.596139166	low
TCGA-RD-A8N1-01A	9.64109589	0	0.068982991	1.745983206	1.529437491	0.024166669	0.04711695	0.754564512	0.845412969	low
TCGA-HU-A4GJ-01A	1.780821918	0	0	1.136908784	1.436812243	0.017282139	0.033824416	0.588250484	0.625787752	low
TCGA-BR-8589-01A	2.260273973	0	0.110265345	1.48820927	2.044556657	0.085886027	0.111418931	0.208228005	0.610597439	low
TCGA-CG-5722-01A	0.082191781	0	0.061352333	1.456449971	1.935336975	0	0.021180655	0.414550418	0.567776993	low
TCGA-CD-8535-01A	1.068493151	0	0.040824191	1.774819617	1.720427458	0.016947179	0.085718999	0.558019789	0.745333723	low
TCGA-3M-AB46-01A	4.835616438	0	0.026132997	2.691911975	2.202095552	0	0.046414321	0.435849842	0.831570807	low
TCGA-VQ-A8P3-01A	3.101369863	0	0.009040271	2.096694431	1.711835412	0	0.035986638	0.27739741	0.729201101	low
TCGA-HU-A4H3-01A	2.416438356	0	0.061854497	2.390370594	1.82478999	0	0.055798772	0.101600068	0.76367141	low
TCGA-IN-A6RJ-01A	1.038356164	0	0.020240169	1.058346451	1.042220424	0	0	0.637363166	0.684144092	low
TCGA-VQ-AA6D-01A	1.42739726	0	0.294444135	1.969730151	2.502165857	0	0.65564536	0.136980798	0.71428028	low
TCGA-BR-8361-01A	2.591780822	0	0.008090194	2.219838049	2.237903066	0.016474369	0.010889518	0.081714977	0.611985386	low
TCGA-D7-5578-01A	1.054794521	0	0.161165	1.953080017	2.089477139	0.023902906	0.031356665	0.349074603	0.69086489	low
TCGA-HU-A4GU-01A	0.547945205	0	0.355730015	2.427420973	2.089013134	0.042974836	0.009626041	0.144908866	0.85828704	low
TCGA-IN-AB1V-01A	1.312328767	0	0.008521205	0.289774601	1.071520975	0.017347506	0.0980004	1.812020194	0.788103724	low
TCGA-HF-7134-01A	4.350684932	0	0.149668066	1.804658365	2.384809292	0.017465678	0.022939224	0.011788894	0.521813358	low
TCGA-B7-5818-01A	0.975342466	0	0.114241842	1.715455619	1.610319977	0.089030419	0.020373208	0.389171931	0.794285324	low
TCGA-D7-A6F2-01A	1.304109589	0	0.208644722	1.309734787	1.158383601	0	0.089750562	0.487454442	0.772355819	low
TCGA-CD-5799-01A	1.084931507	0	0.703886032	1.842245967	2.014301228	0	0.686984278	0.1758644	0.97947685	low
TCGA-VQ-A91S-01A	2.739726027	0	0.045550368	2.106952676	2.109145831	0.013571684	0.148328858	0.302339557	0.697031024	low
TCGA-HU-A4GY-01A	0.021917808	0	0.536859389	1.102772155	1.781628504	0.016815034	0.064602017	1.132881509	0.851341859	low
TCGA-HU-8608-01A	1.756164384	0	0.092907958	1.064765248	2.076076083	0.039273891	0	0.026619685	0.435930019	low
TCGA-BR-6566-01A	2.731506849	0	0.123640763	2.940066867	2.165168109	0.019248072	0.012729979	0.3752116	0.96025116	low
TCGA-CG-5734-11A	0.665753425	1	0	0.44038396	1.187336287	0	0.028791053	0.348227095	0.469126844	low
TCGA-BR-7851-11A	1.57260274	1	0.016029186	0.976287171	1.981154947	0.032484416	0.073104814	0.503059609	0.499764401	low
TCGA-CG-5733-11A	1.756164384	1	0	1.426401181	0.86171322	0	0.088998311	0.348793987	0.772224259	low
TCGA-CG-5720-11A	0.082191781	1	0	0.81221582	1.321064404	0	0	0.338471414	0.510809575	low
TCGA-IN-8663-11A	0.282191781	1	0	0.319528627	0.96251921	0	0.045361192	1.128751392	0.628819453	low
TCGA-D7-5577-01A	2.142465753	1	0.161256779	2.5692058	1.786631591	0.025600551	0	0.045387725	0.862375768	low
TCGA-BR-4280-01A	0.550684932	1	0	1.875089642	2.537129584	0.016293835	0.010769798	0.06733907	0.48340121	low
TCGA-CG-5726-01A	2.41369863	1	0	1.431563729	2.256496208	0	0	0.024272528	0.430042778	low
TCGA-BR-A4QL-01A	1.345205479	1	0.068437751	2.215933319	2.43996187	0.028684409	0.046739716	0.154878837	0.619766608	low
TCGA-CG-5718-01A	3	1	0.207987035	2.053830849	1.489358217	0	0.210036894	0.035381473	0.82248331	low
TCGA-R5-A7ZR-01A	0.506849315	1	0.058456607	1.40736032	1.490097115	0.024416063	1.197285924	0.016502176	0.851540677	low
TCGA-VQ-A8PO-01A	0.77260274	1	0.266150234	2.292530359	2.209751142	0	0.021980577	0.22163216	0.733293577	low
TCGA-VQ-A94R-01A	3.545205479	1	0.023298591	2.536347856	2.369768389	0	0.197603339	0.740535856	0.862628046	low
TCGA-FP-7735-01A	0.290410959	1	0.038607309	1.81151698	1.252821743	0.031732344	0.300313434	0.429495656	0.919616442	low
TCGA-VQ-A8PK-01A	1.487671233	1	0.079556134	2.611448833	1.848669494	0	0.083238862	0.092563373	0.835500417	low
TCGA-CG-5717-01A	0.580821918	1	0.03851364	0.803131487	1.055032186	0	0	0.741259745	0.645643239	low
TCGA-HU-A4HB-01A	1.306849315	1	0.029192415	2.05469277	1.776517278	0	0.326363063	0.421543755	0.817918991	low
TCGA-VQ-A8E0-01A	1.539726027	1	0.387651541	1.036311697	1.315895859	0	0.860395471	0.291390035	0.862843446	low
TCGA-IN-A6RL-01A	1.112328767	1	0.085067338	1.401178117	0.983566721	0.035861425	0.283341255	0.444452038	0.881044407	low
TCGA-CG-5732-01A	5.753424658	1	0.111527437	1.098703838	1.713417941	0.024058392	0.418372098	0.131443777	0.58206454	low
TCGA-CD-5801-01A	1.098630137	1	0	2.312401432	1.635997991	0.030400796	0	0.066706515	0.774484673	low
TCGA-CG-5720-01A	0.082191781	1	0.172362417	1.455967823	2.378206585	0	0.037846507	0.163090683	0.478090617	low
TCGA-CG-4441-01A	1.167123288	1	0.077571093	2.707036211	2.305495358	0	0.053068941	0.739848825	0.918276612	low
TCGA-VQ-A8PC-01A	3.854794521	1	0.008125304	1.675207385	2.028856132	0	0.010936697	0.808913984	0.664515302	low
TCGA-BR-8380-01A	0.057534247	1	0.007296339	1.273011829	1.863332539	0	0.048012334	2.039880946	0.918860012	low
TCGA-VQ-A8PM-01A	0.156164384	1	0.082509297	1.627623612	1.525656865	0	0.711126634	0.70504951	0.962553923	low
TCGA-IN-7808-01A	0.287671233	1	0.086528217	1.025468096	1.790145251	0	0.149630058	1.031646788	0.654937763	low
TCGA-BR-6707-01A	1.657534247	1	0.017964288	2.43869154	2.132734891	0	0.024131877	0.529944021	0.788625495	low
TCGA-VQ-A927-01A	0.547945205	1	0	1.304995749	1.526458964	0.018335897	0.081428386	0.052379531	0.550903363	low
TCGA-VQ-A91U-01A	0.142465753	1	0.062264193	2.273122632	2.344590671	0.032427946	0	0.029143255	0.618161869	low
TCGA-D7-A6EZ-01A	1.693150685	1	0.875055202	1.767514889	1.927359038	0	0.043899772	0.220971637	0.870864638	low
TCGA-VQ-A8PD-01A	1.35890411	1	0.047720506	1.768093049	1.675920273	0	0.032463088	0.654598059	0.750904638	low
TCGA-VQ-A924-01A	4.619178082	1	0.086672381	2.408340224	2.463868764	0.051754806	0.017400541	0.242252935	0.701263725	low
TCGA-HU-A4H8-01A	1.17260274	1	0.064458975	1.297822646	1.965967656	0.013596889	0.052518603	0.174190631	0.503197163	low
TCGA-RD-A8NB-01A	1.405479452	1	0.008869011	1.937172282	2.042356372	0.035727114	0.035315443	0.54381454	0.706894729	low
TCGA-IN-A6RR-01A	0.561643836	1	0.092905528	1.6630757	1.383078712	0.117084155	0.254590802	0.234151512	0.882520595	low
TCGA-VQ-A91D-01A	0.975342466	1	0.71508817	2.023300685	1.802585157	0.012797467	0.073195508	0.118482841	0.922576941	low
TCGA-BR-6565-01A	0.764383562	1	0.054907177	2.356305209	2.24478348	0	0.129682139	0.47051383	0.760466842	low
TCGA-VQ-A94T-01A	0.936986301	1	0.184888697	1.82093185	1.624667629	0.012012641	0.139239761	0.499766402	0.82729026	low
TCGA-VQ-A8PU-01A	2.279452055	1	0	2.029042499	1.952509599	0.025151464	0.032987011	0.011372114	0.61894352	low
TCGA-D7-A6EY-01A	0.953424658	1	0.010800293	2.18185235	1.989724428	0	0.056678148	0.811558636	0.829312493	low
TCGA-CD-5813-01A	1.032876712	1	0.109577254	1.684560656	1.323619626	0	0	0.655803935	0.829523789	low
TCGA-BR-8484-01A	2.098630137	1	0.108525784	2.197919496	1.474373212	0.015656174	0.177561351	0.294898718	0.919720513	low
TCGA-BR-8592-01A	0.523287671	1	0.006403547	1.49190963	1.886102094	0	0.098067952	1.737389637	0.910056158	low
TCGA-BR-7851-01A	1.57260274	1	0.145581405	2.298585053	2.254462351	0.049867094	0.022265119	0.48911952	0.801783224	low
TCGA-VQ-A91N-01A	1.561643836	1	0	1.325013411	2.030361576	0.027917558	0.054316545	2.234920388	0.982247714	low
TCGA-VQ-AA6G-01A	2.169863014	1	0.355056727	1.320865408	1.695269682	0.027938211	0.121744853	0.073170449	0.635858011	low
TCGA-CG-4465-01A	0.750684932	1	0.597969592	2.468844897	2.379534624	0.017171042	0.076433558	0.344493922	0.934251333	low
TCGA-F1-6875-01A	6.019178082	1	0.208123603	1.562725806	1.807365278	0	0.057050801	0.277356469	0.635785077	low
TCGA-VQ-A8E3-01A	1.810958904	1	0.239731723	1.649899275	2.513619248	0.089816024	0.602149837	0.182557771	0.691272217	low
TCGA-CG-5725-01A	1.252054795	1	0.011469362	2.413091657	1.111703834	0.023307657	0.074464766	0.051398111	0.967131294	low
TCGA-BR-6455-01A	1.156164384	1	0.069725772	2.050127627	2.224366959	0.063649723	0	0.708462969	0.774885124	low
TCGA-CD-A4MG-01A	0.547945205	1	0.513323846	2.044524438	1.975362923	0	0.03347582	0.4713069	0.877548868	low
TCGA-BR-A44U-01A	1.156164384	1	0	2.747519181	1.963299578	0.060824605	0.040561578	0.239925337	0.91854514	low
TCGA-CG-4469-01A	0.589041096	1	0.790373711	1.342727882	2.303013261	0.039681799	0.112573717	0.022474043	0.637708509	low
TCGA-BR-8686-01A	1.739726027	1	0.016891503	1.517018524	1.398473001	0.034214208	0.166355558	1.110666846	0.937332852	low
TCGA-VQ-A91X-01A	0.791780822	1	0.017156869	1.667408172	2.076683606	0.034746167	0.258863722	0.019653744	0.571067164	low
TCGA-D7-6527-01A	0.854794521	1	0.070811422	1.515020635	1.542883662	0.018686431	0.75450762	0.656127317	0.93317882	low
TCGA-CG-5734-01A	0.665753425	1	0.0384425	1.703221188	1.647816034	0	0.145669666	0	0.613783762	low
TCGA-BR-4253-01A	0.339726027	1	0.335751452	1.354415998	1.882931283	0	0.02503242	0.066493604	0.5599626	low
TCGA-VQ-A8PF-01A	0.208219178	1	0.128908011	1.966839858	1.868709104	0.048872716	0.10382166	0.357214328	0.779950026	low
TCGA-RD-A7BT-01A	0.717808219	1	0.01820734	2.130970308	2.123403499	0	0.991351735	0.549934362	0.970591792	low
